# Supplementary material for: Towards accurate prediction for laser-coolable molecules: relativistic coupled-cluster calculations for yttrium monoxide and prospects for improving its laser cooling efficiencies
Source: Royal Society of Chemistry journal article supplement (doi:10.1039/d0cp04608f), 2020-01-01
Supplement: d0cp04608f1.pdf [file d0cp04608f1.pdf]

**Supplementary Materials for Towards Accurate Prediction for Laser-Coolable  
Molecules: Relativistic Coupled-Cluster Calculations for Yttrium Monoxide and  
Prospects for Improving its Laser Cooling Efficiencies**

The supplementary information includes a demonstration of the sensitivity of computed Franck-Condon factors (FCFs) with respect to harmonic frequencies (Table I) and Franck-Condon factors for a complete list of transitions between electronic states (Table II).

TABLE I. Calculated FCFs using Morse potentials with parameters obtained at the EOM-CCSD/ $\infty$ Z/sc+ $\Delta$ T level and with the use of various values for the harmonic frequency of the  $X^2\Sigma$  state. The original EOM-CCSD/ $\infty$ Z/sc+ $\Delta$ T harmonic frequency for the  $X^2\Sigma$  state is 853.5  $\text{cm}^{-1}$ . As can be seen, a shift of harmonic frequencies by 50  $\text{cm}^{-1}$  only changes individual computed FCFs by less than 1%.

|                                            |       | Harmonic frequencies for $X^2\Sigma$ state ( $\text{cm}^{-1}$ ) |         |         |         |         |         |         |
|--------------------------------------------|-------|-----------------------------------------------------------------|---------|---------|---------|---------|---------|---------|
| transitions                                | $\nu$ | 803.5                                                           | 823.5   | 843.5   | 853.5   | 863.5   | 883.5   | 903.5   |
| $A^2\Pi(0) \rightarrow X^2\Sigma(\nu)$     | 0     | 99.699%                                                         | 99.689% | 99.665% | 99.648% | 99.627% | 99.577% | 99.515% |
|                                            | 1     | 0.295%                                                          | 0.310%  | 0.326%  | 0.333%  | 0.340%  | 0.354%  | 0.368%  |
|                                            | 2     | 0.006%                                                          | <0.001% | 0.009%  | 0.019%  | 0.032%  | 0.069%  | 0.117%  |
| $B^2\Sigma(0) \rightarrow X^2\Sigma(\nu)$  | 0     | 82.819%                                                         | 82.552% | 82.280% | 82.142% | 82.003% | 81.724% | 81.441% |
|                                            | 1     | 16.083%                                                         | 16.129% | 16.163% | 16.176% | 16.187% | 16.202% | 16.208% |
|                                            | 2     | 1.066%                                                          | 1.265%  | 1.472%  | 1.579%  | 1.687%  | 1.909%  | 2.136%  |
|                                            | 3     | 0.031%                                                          | 0.053%  | 0.082%  | 0.098%  | 0.116%  | 0.155%  | 0.199%  |
|                                            | 4     | <0.001%                                                         | 0.001%  | 0.003%  | 0.004%  | 0.006%  | 0.010%  | 0.015%  |
|                                            | 5     | <0.001%                                                         | <0.001% | <0.001% | <0.001% | <0.001% | <0.001% | 0.001%  |
| $A'^2\Delta(0) \rightarrow X^2\Sigma(\nu)$ | 0     | 87.448%                                                         | 87.239% | 87.023% | 86.912% | 86.800% | 86.571% | 86.338% |
|                                            | 1     | 12.061%                                                         | 12.122% | 12.174% | 12.197% | 12.218% | 12.253% | 12.281% |
|                                            | 2     | 0.485%                                                          | 0.623%  | 0.773%  | 0.853%  | 0.934%  | 1.105%  | 1.284%  |
|                                            | 3     | 0.006%                                                          | 0.015%  | 0.029%  | 0.037%  | 0.046%  | 0.067%  | 0.092%  |
|                                            | 4     | <0.001%                                                         | <0.001% | 0.001%  | 0.001%  | 0.002%  | 0.003%  | 0.005%  |

TABLE II. Calculated Franck-Condon factors using EOM-CCSD/ $\infty$ Z/sc+ $\Delta$ T+ $\Delta$ SO ab initio potential energy surfaces.

| transitions/ $\nu$                                     | 0       | 1       | 2       | 3       | 4       | 5       |
|--------------------------------------------------------|---------|---------|---------|---------|---------|---------|
| $A^2\Pi_{1/2}(0) \rightarrow X^2\Sigma_{1/2}(\nu)$     | 99.563% | 0.416%  | 0.020%  | <0.001% | <0.001% | <0.001% |
| $A^2\Pi_{3/2}(0) \rightarrow X^2\Sigma_{1/2}(\nu)$     | 99.687% | 0.293%  | 0.019%  | <0.001% | <0.001% | <0.001% |
| $A'^2\Delta_{3/2}(0) \rightarrow X^2\Sigma_{1/2}(\nu)$ | 86.600% | 12.464% | 0.895%  | <0.040% | 0.001%  | <0.001% |
| $A'^2\Delta_{5/2}(0) \rightarrow X^2\Sigma_{1/2}(\nu)$ | 87.209% | 11.936% | 0.820%  | <0.035% | 0.001%  | <0.001% |
| $B^2\Sigma_{1/2}(0) \rightarrow X^2\Sigma_{1/2}(\nu)$  | 82.411% | 15.954% | 1.536%  | <0.094% | 0.004%  | <0.001% |
| $A^2\Pi_{1/2}(0) \rightarrow A'^2\Delta_{3/2}(\nu)$    | 90.762% | 8.623%  | 0.580%  | 0.034%  | 0.002%  | <0.001% |
| $A^2\Pi_{3/2}(0) \rightarrow A'^2\Delta_{3/2}(\nu)$    | 90.169% | 9.139%  | 0.650%  | 0.040%  | 0.002%  | <0.001% |
| $A^2\Pi_{1/2}(0) \rightarrow A'^2\Delta_{5/2}(\nu)$    | 91.279% | 8.167%  | 0.523%  | 0.029%  | 0.001%  | <0.001% |
| $A^2\Pi_{3/2}(0) \rightarrow A'^2\Delta_{5/2}(\nu)$    | 90.700% | 8.675%  | 0.589%  | 0.034%  | 0.002%  | <0.001% |
| $B^2\Sigma_{1/2}(0) \rightarrow A^2\Pi_{1/2}(\nu)$     | 87.118% | 12.233% | 0.633%  | 0.015%  | <0.001% | <0.001% |
| $B^2\Sigma_{1/2}(0) \rightarrow A^2\Pi_{3/2}(\nu)$     | 86.443% | 12.834% | 0.706%  | 0.018%  | <0.001% | <0.001% |
| $B^2\Sigma_{1/2}(0) \rightarrow A'^2\Delta_{3/2}(\nu)$ | 99.635% | 0.365%  | <0.001% | <0.001% | <0.001% | <0.001% |
| $B^2\Sigma_{1/2}(0) \rightarrow A'^2\Delta_{5/2}(\nu)$ | 99.514% | 0.485%  | 0.001%  | <0.001% | <0.001% | <0.001% |
